# Supplementary material for: Structural and Proteomic Changes in Viable but Non-culturable Vibrio cholerae
Source: Front Microbiol. 2019 Apr 17;10:793. doi: 10.3389/fmicb.2019.00793 (PMC6479200; doi:10.3389/fmicb.2019.00793)
Supplement: Supplementary file 8 [file Table_4.XLSX]

## Sheet: Sheet1
	Category	GO term	Count	%	P-Value
More abundant in VBNC cells	Up_Keywords	Ribosomal protein	35	5.2	3.2e-11
	Up_Keywords	Signal	96	14.1	3.2e-07
	Up_Keywords	rRNA-binding	23	3.4	3.5e-07
	Up_Keywords	Arginine biosynthesis	11	1.6	1e-06
	Kegg_Pathway	Sulfur metabolism	12	1.8	0.00053
	Up_Keywords	Transcription regulation	57	8.4	0.00063
	Kegg_Pathway	ABC transporters	39	5.7	0.0066
	Kegg_Pathway	Biosynthesis of amino acids	35	5.2	0.0099
	Kegg_Pathway	Selenocompound metabolism	6	0.9	0.01
	Kegg_Pathway	Bacterial chemotaxis	23	3.4	0.012
	Up_Keywords	Activator	9	1.3	0.025
	Up_Keywords	Repressor	9	1.3	0.025
	Up_Keywords	TonB box	5	0.7	0.035
	Up_Keywords	DNA-binding	56	8.2	0.041
	Up_Keywords	Iron	23	3.4	0.045
	Kegg_Pathway	Two-component system	40	5.9	0.046
	Kegg_Pathway	Flagellar assembly	13	1.9	0.051
	Up_Keywords	Protease	16	2.4	0.057
	Up_Keywords	ATP synthesis	5	0.7	0.059
	Up_Keywords	Cysteine biosynthesis	4	0.6	0.06
	Up_Keywords	Stress response	7	1	0.065
	Up_Keywords	Chaperone	11	1.6	0.066
	Up_Keywords	Ion transport	14	2.1	0.068
	Up_Keywords	Cell outer membrane	9	1.3	0.077
	Up_Keywords	NAD	14	2.1	0.08
	Up_Keywords	Two-component regulatory system	13	1.9	0.095
Less abundant in VBNC cells	Kegg_Pathway	Metabolic pathways	200	33.3	6.9e-18
	Kegg_Pathway	Biosynthesis of secondary metabolites	112	18.6	8.5e-13
	Up_Keywords	Metal-binding	101	16.8	3.9e-12
	Kegg_Pathway	Carbon metabolism	50	8.3	1.9e-09
	Up_Keywords	Transferase	113	18.8	3e-09
	Up_Keywords	Nucleotide-binding	99	16.5	1e-07
	Kegg_Pathway	Citrate cycle (TCA cycle)	19	3.2	1.8e-07
	Up_Keywords	Magnesium	46	7.7	8e-07
	Up_Keywords	Oxidoreductase	43	7.2	2.7e-06
	Up_Keywords	Lyase	35	5.8	3e-06
	Up_Keywords	4Fe-4S	17	2.8	3.4e-05
	Up_Keywords	ATP-binding	80	13.3	5.6e-05
	Up_Keywords	Glycosyltransferase	14	2.3	0.00011
	Up_Keywords	Pyridoxal phosphate	17	2.8	0.00043
	Kegg_Pathway	Biosynthesis of amino acids	45	7.5	0.00051
	Kegg_Pathway	Glyoxylate and dicarboxylate metabolism	14	2.3	0.0014
	Kegg_Pathway	Terpenoid backbone biosynthesis	9	1.5	0.0021
	Kegg_Pathway	Butanoate metabolism	15	2.5	0.0025
	Up_Keywords	Isoprene biosynthesis	6	1	0.0028
	Up_Keywords	Acyltransferase	13	2.2	0.0038
	Up_Keywords	GTP-binding	13	2.2	0.0038
	Up_Keywords	Isomerase	22	3.7	0.0043
	Up_Keywords	Ligase	24	4	0.0048
	Up_Keywords	Thiamine pyrophosphate	6	1	0.0064
	Up_Keywords	Cell division	15	2.5	0.0074
	Kegg_Pathway	Oxidative phosphorylation	16	2.7	0.008
	Kegg_Pathway	Glycine, serine and threonine metabolism	16	2.7	0.011
	Up_Keywords	Tricarboxylic acid cycle	6	1	0.012
	Kegg_Pathway	Starch and sucrose metabolism	10	1.7	0.015
	Up_Keywords	Kinase	29	4.8	0.016
	Kegg_Pathway	Pentose phosphate pathway	11	1.8	0.016
	Kegg_Pathway	Pyruvate metabolism	19	3.2	0.021
	Up_Keywords	Purine biosynthesis	8	1.3	0.022
	Up_Keywords	Sugar transport	10	1.7	0.025
	Up_Keywords	NADP	13	2.2	0.03
	Up_Keywords	NAD	14	2.3	0.034
	Up_Keywords	Lipopolysaccharide biosynthesis	5	0.8	0.039
	Kegg_Pathway	Purine metabolism	25	4.2	0.04
	Kegg_Pathway	Amino sugar and nucleotide sugar metabolism	18	3	0.042
	Kegg_Pathway	Fructose and mannose metabolism	10	1.7	0.046
	Up_Keywords	Respiratory chain	3	0.5	0.085
	Up_Keywords	S-adenosyl-L-methionine	16	2.7	0.085
	Up_Keywords	Ribosome biogenesis	5	0.8	0.088
